# Supplementary material for: Strong familial association of bone mineral density between parents and offspring: KNHANES 2008–2011
Source: Springer Nature journal article supplement (doi:10.1007/s00198-016-3806-1), 2016-10-17
Supplement: MOESM1 [file 10883288]

Supplemental Table 1. Partial correlation analyses of BMD between parents and offspring adjusted for their respective age

|  | Father | | | | Mother | | | |
| --- | --- | --- | --- | --- | --- | --- | --- | --- |
|  | LS BMD | FN BMD | TH BMD | WB BMD | LS BMD | FN BMD | TH BMD | WB BMD |
| Offspring aged 10-18 years | | | | | | | | |
| Son |  |  |  |  |  |  |  |  |
| LS BMD | 0.226a | 0.174 a | 0.239 a | 0.233 a | 0.292 a | 0.243 a | 0.257 a | 0.304 a |
| FN BMD | 0.161 a | 0.257 a | 0.299 a | 0.254 a | 0.180 a | 0.303 a | 0.270 a | 0.287 a |
| TH BMD | 0.168 a | 0.239 a | 0.338 a | 0.235 a | 0.191 a | 0.305 a | 0.335 a | 0.278 a |
| WB BMD | 0.174 a | 0.241 a | 0.219 a | 0.505 a | 0.223 a | 0.246 a | 0.182 a | 0.510 a |
| Daughter |  |  |  |  |  |  |  |  |
| LS BMD | 0.265 a | 0.222 a | 0.261 a | 0.267 a | 0.312 a | 0.275 a | 0.293 a | 0.267 a |
| FN BMD | 0.157 a | 0.267 a | 0.269 a | 0.244 a | 0.256 a | 0.383 a | 0.374 a | 0.292 a |
| TH BMD | 0.188 a | 0.257 a | 0.337 a | 0.256 a | 0.266 a | 0.374 a | 0.426 a | 0.272 a |
| WB BMD | 0.190 a | 0.221 a | 0.218 a | 0.490 a | 0.288 a | 0.296 a | 0.276 a | 0.524 a |
| Offspring aged 19-25 years | | | | | | | | |
| Son |  |  |  |  |  |  |  |  |
| LS BMD | 0.258 a | 0.230 a | 0.259 a | 0.209 a | 0.314 a | 0.248 a | 0.264 a | 0.236 a |
| FN BMD | 0.144 c | 0.281 a | 0.262 a | 0.220 a | 0.188 a | 0.229 a | 0.233 a | 0.188 a |
| TH BMD | 0.160 b | 0.266 a | 0.314 a | 0.234 a | 0.197 a | 0.241 a | 0.291 a | 0.183 a |
| WB BMD | 0.185 b | 0.239 a | 0.216 a | 0.429 a | 0.235 a | 0.197 a | 0.201 a | 0.420 a |
| Daughter |  |  |  |  |  |  |  |  |
| LS BMD | 0.264 a | 0.189 a | 0.178 a | 0.237 a | 0.371 a | 0.291 a | 0.262 a | 0.244 a |
| FN BMD | 0.174 b | 0.267 a | 0.210 a | 0.220 a | 0.269 a | 0.324 a | 0.295 a | 0.240 a |
| TH BMD | 0.187 a | 0.245 a | 0.269 a | 0.212 a | 0.300 a | 0.347 a | 0.386 a | 0.244 a |
| WB BMD | 0.248 a | 0.260 a | 0.169 b | 0.558 a | 0.281 a | 0.240 a | 0.188 a | 0.517 a |

BMD, bone mineral density; LS, lumbar spine; FN, femur neck; TH, total hip; WB, whole body.

a*P* < 0.001; b*P* < 0.01; c*P* < 0.05.
